# Supplementary material for: Distribution of black carbon in ponderosa pine forest floor and soils following the High Park wildfire
Source: Copernicus journal article supplement (doi:10.5194/bg-12-3029-2015), 2015-05-22
Supplement: Supplementary file 1 [file bg-12-3029-2015-supplement.pdf]

Supplement of Biogeosciences, 12, 3029–3039, 2015  
<http://www.biogeosciences.net/12/3029/2015/>  
doi:10.5194/bg-12-3029-2015-supplement  
© Author(s) 2015. CC Attribution 3.0 License.

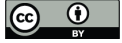

*Supplement of*

## **Distribution of black carbon in ponderosa pine forest floor and soils following the High Park wildfire**

**C. M. Boot et al.**

*Correspondence to:* C. M. Boot ([claudia.boot@colostate.edu](mailto:claudia.boot@colostate.edu))

The copyright of individual parts of the supplement might differ from the CC-BY 3.0 licence.

1 **Supplement**

2 **Bulk Density Determination**

3 During excavation, if the majority of a rock resided inside the frame that rock was  
4 collected, if the majority of a rock was outside the frame the rock was left in place and the  
5 soil was excavated around the rock. Thin nylon fabric was used to line the pit and millet  
6 was added to the pit until level with the top of the excavation frame. The volume of the  
7 millet was determined with a graduated cylinder. The volume for the 0-5 cm depth was the  
8 volume of the millet that filled the entire 0-5 cm depth, with the volume of the frame  
9 thickness subtracted. The volume of the 5-15 cm depth was the volume of the millet the  
10 filled the entire 0-15 cm depth with the volume of the entire 0-5 cm depth subtracted.

11

12 **BPCA method validation**

13 The BPCA method was validated by evaluating an unburned field soil from our site that  
14 was mixed with a laboratory produced biochar at 5, 20 and 50% soil weight. The  
15 laboratory biochar was derived from beetle-killed pine sourced from the CLP drainage  
16 combusted at approximately 400 to 500 °C and ground to a fine texture. The BPCA method  
17 validation with biochar-amended soils generated a linear relationship among the samples  
18 ( $BPCA-C = -1.506 + (0.89 * \% \text{ char})$ ,  $r^2 = 0.94$ ,  $p < 0.001$ ). The coefficients of variation at  
19 different amendment levels were 0.05 at 5% amendment, 0.07 at 20% amendment, and  
20 0.19 at 50% amendment. The majority of BPCA-C values in our field study were below the  
21 5% amendment, thus we concluded the method was robust for quantifying BC and  
22 progressed with field-based sample collections.

23

24

25

26

27

28

29

30

31

32 **Table S1.** Results of mixed model evaluating the effects of layer, burn severity, and slope  
 33 on C and N values and bulk density presented with degrees of freedom (df) and p-values.

| effect               | df | log %C           | log %N           | C:N              | log C stock<br>(g C m <sup>-2</sup> ) | bulk<br>density |
|----------------------|----|------------------|------------------|------------------|---------------------------------------|-----------------|
| slope                | 2  | 0.306            | 0.872            | <b>0.009</b>     | 0.774                                 | 0.927           |
| burn                 | 2  | <b>0.002</b>     | 0.135            | <b>&lt;0.001</b> | 0.080                                 | 0.796           |
| layer                | 2  | <b>&lt;0.001</b> | <b>&lt;0.001</b> | <b>&lt;0.001</b> | <b>&lt;0.001</b>                      | 0.109           |
| slope x burn         | 4  | 0.917            | 0.746            | 0.838            | 0.671                                 | 0.691           |
| slope x layer        | 4  | 0.077            | 0.051            | 0.725            | 0.672                                 | 0.617           |
| burn x layer         | 4  | <b>&lt;0.001</b> | <b>0.005</b>     | <b>&lt;0.001</b> | 0.284                                 | 0.792           |
| slope x burn x layer | 8  | 0.093            | 0.169            | 0.685            | 0.534                                 | 0.875           |

34  
35

36 **Table S2.** Results of Tukey's post-hoc comparisons evaluating the source of significant  
 37 differences in %C, %N, C:N and C stocks by burn severity, layer, slope and the interaction  
 38 terms presented as adjusted p-values.

| post hoc comparisons                | log % C          | log % N          | C:N              | log C stock<br>(g C m <sup>-2</sup> ) |
|-------------------------------------|------------------|------------------|------------------|---------------------------------------|
| high vs. unburned                   | <b>0.001</b>     | 0.132            | <b>&lt;0.001</b> | 0.320                                 |
| moderate vs. unburned               | 0.371            | 0.835            | <b>&lt;0.001</b> | 0.708                                 |
| high vs. moderate                   | <b>0.029</b>     | 0.318            | <b>0.004</b>     | 0.069                                 |
| 0-5 cm vs. forest floor             | <b>&lt;0.001</b> | <b>&lt;0.001</b> | <b>&lt;0.001</b> | <b>&lt;0.001</b>                      |
| 5-15 cm vs. forest floor            | <b>&lt;0.001</b> | <b>&lt;0.001</b> | <b>&lt;0.001</b> | <b>&lt;0.001</b>                      |
| 0-5 cm vs. 5-15 cm                  | <b>&lt;0.001</b> | <b>&lt;0.001</b> | 0.703            | 0.696                                 |
| 0-5 vs. 5-15 degrees                | 0.998            | 0.941            | <b>0.028</b>     | 0.755                                 |
| 0-5 vs. 15-30 degrees               | 0.932            | 0.984            | <b>0.012</b>     | 0.915                                 |
| 5-15 cm vs. 15-30 degrees           | 0.947            | 0.864            | 0.916            | 0.944                                 |
| forest floor: unburned vs. moderate | <b>0.009</b>     | 0.968            | <b>&lt;0.001</b> | 0.217                                 |
| forest floor: unburned vs. high     | <b>&lt;0.001</b> | <b>0.004</b>     | <b>&lt;0.001</b> | 0.400                                 |
| forest floor: moderate vs. high     | <b>&lt;0.001</b> | <b>0.006</b>     | <b>&lt;0.001</b> | <b>0.009</b>                          |
| 0-5 cm: unburned vs. moderate       | 0.631            | 0.978            | 0.471            | 0.938                                 |
| 0-5 cm: unburned vs. high           | 0.947            | 0.513            | 1.000            | 0.805                                 |
| 0-5 cm: moderate vs. high           | 0.166            | 0.376            | 0.448            | 0.582                                 |
| 5-15 cm: unburned vs. moderate      | 0.662            | 0.448            | 0.999            | 0.840                                 |
| 5-15 cm: unburned vs. high          | 0.947            | 0.999            | 0.674            | 0.706                                 |
| 5-15 cm: moderate vs. high          | 0.836            | 0.399            | 0.628            | 0.968                                 |

39

40 **Table S3.** Results of mixed model evaluating the effects of layer, burn severity and slope on  
 41 BPCA-C concentration and stocks presented as degrees of freedom (df) and p-values.

| effect               | df | BPCA C (g kg <sup>-1</sup> C) | log BPCA C stock (g BPCA-C m <sup>-2</sup> ) |
|----------------------|----|-------------------------------|----------------------------------------------|
| slope                | 2  | 0.446                         | 0.801                                        |
| burn                 | 2  | <b>0.007</b>                  | <b>0.012</b>                                 |
| layer                | 2  | 0.610                         | <b>&lt;0.001</b>                             |
| slope x burn         | 4  | 0.191                         | 0.853                                        |
| slope x layer        | 4  | 0.740                         | 0.829                                        |
| burn x layer         | 4  | <b>&lt;0.001</b>              | <b>&lt;0.001</b>                             |
| slope x burn x layer | 8  | 0.545                         | 0.679                                        |

42  
 43 **Table S4.** Results of Tukey's post-hoc comparisons evaluating the source of significant  
 44 differences in BPCA-C concentration and stocks by burn severity, layer, and the burn by  
 45 layer interaction presented as adjusted p-values.

| post hoc comparisons                | BPCA C (g BPCA-C kg <sup>-1</sup> C) | log BPCA C stock (g BPCA-C m <sup>-2</sup> ) |
|-------------------------------------|--------------------------------------|----------------------------------------------|
| high vs. unburned                   | <b>0.005</b>                         | 0.135                                        |
| moderate vs. unburned               | 0.072                                | <b>0.009</b>                                 |
| high vs. moderate                   | 0.576                                | 0.408                                        |
| 0-5 cm vs. forest floor             | 0.980                                | <b>&lt;0.001</b>                             |
| 5-15 cm vs. forest floor            | 0.734                                | <b>&lt;0.001</b>                             |
| 0-5 cm vs. 5-15 cm                  | 0.615                                | 0.814                                        |
| unburned: 0-5 cm vs. forest floor   | <b>&lt;0.001</b>                     | <b>&lt;0.001</b>                             |
| unburned: 5-15 cm vs. forest floor  | <b>0.004</b>                         | <b>&lt;0.001</b>                             |
| unburned: 0-5 cm vs 5-15 cm         | 0.711                                | 0.882                                        |
| moderate: 0-5 cm vs. forest floor   | 0.418                                | 0.484                                        |
| moderate: 5-15 cm vs. forest floor  | 0.085                                | 0.847                                        |
| moderate: 0-5 cm vs 5-15 cm         | 0.646                                | 0.817                                        |
| high: 0-5 cm vs. forest floor       | <b>0.023</b>                         | 0.172                                        |
| high: 5-15 cm vs. forest floor      | <b>0.027</b>                         | 0.162                                        |
| high: 0-5 cm vs. 5-15 cm            | 0.998                                | 0.999                                        |
| forest floor: unburned vs. moderate | <b>&lt;0.001</b>                     | <b>&lt;0.001</b>                             |
| forest floor: unburned vs. high     | <b>&lt;0.001</b>                     | <b>&lt;0.001</b>                             |
| forest floor: moderate vs. high     | 0.445                                | 0.330                                        |
| 0-5 cm: unburned vs. moderate       | 0.874                                | 0.999                                        |
| 0-5 cm: unburned vs. high           | 0.761                                | 0.696                                        |
| 0-5 cm: moderate vs. high           | 0.974                                | 0.709                                        |
| 5-15 cm: unburned vs. moderate      | 0.845                                | 0.989                                        |
| 5-15 cm: unburned vs. high          | 0.986                                | 0.948                                        |
| 5-15 cm: moderate vs. high          | 0.742                                | 0.983                                        |

46

47 **Table S5.** Results of mixed model evaluating the effects of burn, layer and their interaction  
 48 on the relative abundances of B6CA, B5CA, B4CA and the ratio of B5CA:B6CA presented as  
 49 degrees of freedom (df) and adjusted p-values.

| effect       | df | B6CA             | B5CA             | B4CA             | B5CA:B6CA    |
|--------------|----|------------------|------------------|------------------|--------------|
| burn         | 2  | 0.902            | 0.939            | 0.401            | 0.805        |
| layer        | 2  | <b>&lt;0.001</b> | <b>&lt;0.001</b> | <b>&lt;0.001</b> | <b>0.002</b> |
| burn x layer | 4  | 0.079            | 0.288            | 0.543            | 0.053        |

50

51 **Table S6.** Tukey's Post hoc comparisons among layers and burn by layer interaction for  
 52 relative abundance of B6CA, B5CA, B4CA and the ratio of B5CA:B6CA presented as the  
 53 adjusted p-values.

| post hoc comparisons     | B6CA             | B5CA             | B4CA             | B5CA:B6CA    |
|--------------------------|------------------|------------------|------------------|--------------|
| 0-5 cm vs. forest floor  | 0.997            | <b>&lt;0.001</b> | <b>&lt;0.001</b> | 0.115        |
| 5-15 cm vs. forest floor | <b>&lt;0.001</b> | <b>&lt;0.001</b> | 0.148            | <b>0.001</b> |
| 0-5 cm vs. 5-15 cm       | <b>&lt;0.001</b> | <b>0.037</b>     | <b>0.002</b>     | 0.176        |

54

55
